# Supplementary material for: Interpenetrated nano-capsule networks based on the alkali metal assisted assembly of p-carboxylatocalix[4]arene-O-methyl ether
Source: Royal Society of Chemistry journal article supplement (doi:10.1039/b716777f), 2008-01-01
Supplement: b716777f.pdf [file b716777f.pdf]

Supplementary Information for Manuscript B716777F

**Scott J. Dalgarno, Karla M. Claudio Bosque, John E. Warren, Timothy E. Glass and Jerry L. Atwood**

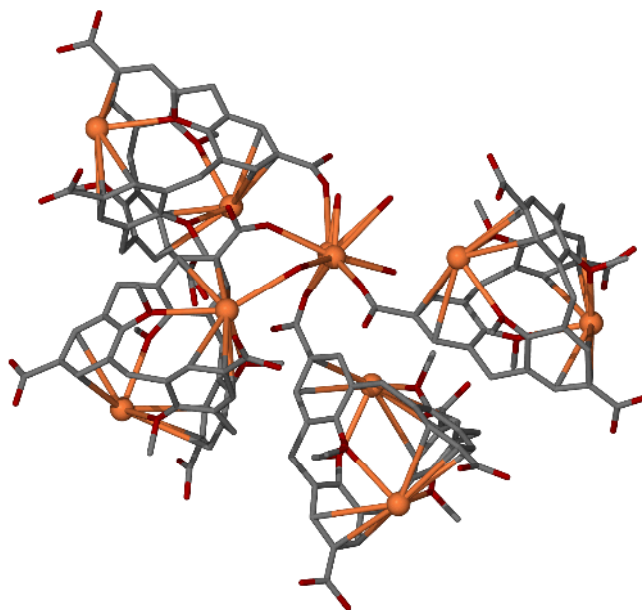

**Figure S1.** The additional Rb-carboxylate bonding found in 4·Rb.
